# Supplementary material for: Highly Pathogenic Avian Influenza A(H5N1) Virus Clade 2.3.4.4b in Wild Birds and Live Bird Markets, Egypt
Source: MDPI journal article supplement (doi:10.3390/pathogens12010036), 2022-12-26
Supplement: s1 [file s1]

Table S1: GenBank Accession Number

| Segment | A/duck/Egypt/BA20360C/2<br>022 | A/pintail/Egypt/RA19853OP/2<br>021 | A/duck/Egypt/BA20361OP/2<br>022 | A/duck/Egypt/BA20360OP/2<br>022 |
|---------|--------------------------------|------------------------------------|---------------------------------|---------------------------------|
| PB2     | OP590394                       | OP590530                           | OP590514                        | OP590410                        |
| PB1     | OP590395                       | OP590531                           | OP590515                        | OP590411                        |
| PA      | OP590396                       | OP590532                           | OP590516                        | OP590412                        |
| HA      | OP590397                       | OP590533                           | OP590517                        | OP590413                        |
| NP      | OP590398                       | OP590534                           | OP590518                        | OP590414                        |
| NA      | OP590399                       | OP590535                           | OP590519                        | OP590415                        |
| MP      | OP590400                       | OP590536                           | OP590520                        | OP590416                        |
| NS      | OP590401                       | OP590537                           | OP590521                        | OP590417                        |
